# Supplementary material for: Factors associated with time to first healthcare visit, diagnosis and treatment, and their impact on survival among breast cancer patients in Mali
Source: PubMed Central journal article supplement (PMC6264812; doi:10.1371/journal.pone.0207928), 2018-11-29
Supplement: pone.0207928.s001.pdf [file pone.0207928.s001.pdf]

**Module 1 : Socioéconomique**

1.1 N° fiche d'enquête : \_\_\_\_\_ /

1.2. N° du dossier : \_\_\_\_\_ /

1.3. Nom et Prénoms : \_\_\_\_\_ /

1.4 Avez-vous une assurance médicale ? \_\_\_\_\_ /

1= Oui 2= Non 3= Autres \_\_\_\_\_ /

1.5 Qui a assuré le financement de votre diagnostic et traitement ? \_\_\_\_\_ / \_\_\_\_\_ / \_\_\_\_\_ /

1= Vous-même 2= Votre mari/famille 3= Autres \_\_\_\_\_ /

1.6 Avant votre maladie du sein, avez-vous eu la connaissance de l'autopalpation ? \_\_\_\_\_ /

1= Oui 2= Non 3= Autres \_\_\_\_\_ /

**Module 2 : Première changement du sein, avant la première consultation**

2.1 Quel était le(s) premier(s) changement(s) dans votre sein(s) ? \_\_\_\_\_ / \_\_\_\_\_ / \_\_\_\_\_ /

1= Nodule ou tuméfaction 2= Douleur 3= Autres \_\_\_\_\_ /

2.2 Quand vous avez perçu de(s) premier(s) changement(s) dans votre sein(s) ?

**\*Date la plus précise possible (Calendrier) :** \_\_\_\_\_ (jj/mm/aaaa)

2.3. Estimation de la date: \_\_\_\_\_ /

1=Date approximative 2=Date précise

2.4 Quelle a été votre première pensée par rapport au changement(s) ? \_\_\_\_\_ /

1= Rien de grave 2= Une infection 3= Un cancer 4= Autres \_\_\_\_\_ /

2.5 Qu'est-ce que vous a empêcher de pas consulté un médecin? \_\_\_\_\_ /

1= Rien 2=Manque de la connaissance des symptômes 3= Manque de l'argent

4= Autres \_\_\_\_\_ /

2.6 Avez-vous vu un tradi- thérapeute avant de consulter un médecin? \_\_\_\_\_ /

1= Oui 2= Non

**Module 3 : Première consultation d'un médecin**

3.1 Quand vous avez consulté la première fois un médecin ?

**\*Date la plus précise possible (Calendrier) :** \_\_\_\_\_ (jj/mm/aaaa)

3.2 Estimation de la date: \_\_\_\_\_ /

1=Date approximative 2=Date précise 3=Date vérifiée par \_\_\_\_\_

3.3 Qu'elle était la raison qui vous a poussé à consulter un médecin? \_\_\_\_\_ /

1= Connaissance des signes de cancer 2= Persistance/aggravation du changement

3= Recommandation d'une autre personne 4= Autres \_\_\_\_\_ /

3.4 C'était quel type de médecin ? \_\_\_\_\_ /

1= Généraliste 2= Gynécologue 3= Oncologue 4= Chirurgien 5= Radiologue

6= Autres \_\_\_\_\_ /

3.5 Le médecin a travaillé dans quelle structure de santé sanitaire ? \_\_\_\_\_ /

1= CS Com 2= CS Ref 3= Hôpital 4= Clinique privé 5=Autres \_\_\_\_\_ /

3.6 Qu'est-ce que ce médecin vous a dit par rapport à votre changement du sein ? \_\_\_\_\_ / \_\_\_\_\_ /

1=Rien du grave 2=Une inflammation 3= Qqc sérieux 4=Peut-être un cancer

5=Rien 6= Autre \_\_\_\_\_ /

3.7 Qu'est-ce que ce médecin vous a recommandé ? \_\_\_\_\_ / \_\_\_\_\_ / \_\_\_\_\_ / \_\_\_\_\_ /

1= Mammographie 2= Echographie 3=Biopsie 4=Cytoponction

5= Chirurgie 6= Traitement Médical 7=Rien 8= Autres \_\_\_\_\_ /

3.8 Est-ce que ce médecin vous a référé? \_\_\_\_\_ /

1=Oui 2=Non 3= Autres \_\_\_\_\_ /

3.9 Qu'est-ce que vous avez fait après cette première consultation ? \_\_\_\_\_ / \_\_\_\_\_ / \_\_\_\_\_ /

1= Obéir aux conseils du médecin 2= Consulté un autre médecin

3= Vu un tradi- thérapeute 4=Autres \_\_\_\_\_ /

#### **Module 4 : Après la première consultation jusqu'au diagnostic**

4.1 Combien des consultations (compter aussi plusieurs des consultations chez le même médecin) vous avez fait pour avoir le diagnostic ? (*Inclus la première consultation et le diagnostic*). \_\_\_\_\_ /

Après votre première consultation et avant le diagnostic vous avez consulté :

|     | Type de médecin (a)                                                         | Structure sanitaire (b)                                              | Diagnostic (d)                                                                            | Conseille (e)                                                                                                                  | Date référé chez Point G |
|-----|-----------------------------------------------------------------------------|----------------------------------------------------------------------|-------------------------------------------------------------------------------------------|--------------------------------------------------------------------------------------------------------------------------------|--------------------------|
| 4.2 |                                                                             |                                                                      |                                                                                           |                                                                                                                                |                          |
| 4.3 |                                                                             |                                                                      |                                                                                           |                                                                                                                                |                          |
| 4.4 |                                                                             |                                                                      |                                                                                           |                                                                                                                                |                          |
| 4.5 |                                                                             |                                                                      |                                                                                           |                                                                                                                                |                          |
| 4.7 |                                                                             |                                                                      |                                                                                           |                                                                                                                                |                          |
| 4.8 |                                                                             |                                                                      |                                                                                           |                                                                                                                                |                          |
| 4.9 |                                                                             |                                                                      |                                                                                           |                                                                                                                                |                          |
|     | 1= Généraliste<br>2=Gynécologue<br>3=Oncologue<br>4=Chirurgien<br>5= Autres | 1=CS Com<br>2= CS Ref<br>3= Hôpital<br>4= Clinique privé<br>5=Autres | 1= Rien du grave<br>2= Inflammation<br>3= Qqc sérieux<br>4= Cancer<br>5= Rien<br>6=Autres | 1= Mammographie<br>2= Echographie<br>3=Biopsie<br>4=Cytoponction<br>5= Chirurgie<br>6=Traitement Médical<br>7=Rien<br>8=Autres |                          |

**Module 5 : Le diagnostic**

5.1 Quand est-ce le diagnostic de votre cancer a été posé?

**\*Date la plus précise possible (Calendrier) :** \_\_\_\_\_(jj/mm/aaaa)

5.2 Estimation de la date : \_\_\_\_\_/

1=Date approximative      2=Date précise      3= Date vérifiée par \_\_\_\_\_/

5.3 C'était quel type de médecin qui a fait le diagnostic? \_\_\_\_\_/

1= Généraliste    2=Gynécologue    3=Oncologue    4=Chirurgien    5= Radiologue  
6= Le dernière médecin qui vous avez consulté, continuer avec 5.5    7=Autres \_\_\_\_\_/

5.4 Le médecin qui a fait le diagnostic a travaillé dans quel type structure sanitaire? \_\_\_\_\_/

1=CS Com    2=CS Ref    3= Hôpital    4=Clinique privé    5=Autres \_\_\_\_\_/

5.5 Sur quelle base le médecin a fait le diagnostic? \_\_\_\_\_/\_\_\_\_\_/\_\_\_\_\_/\_\_\_\_\_/

1= Mammographie      2= Echographie      3=Biopsie      4=Cytoponction  
5= Autres \_\_\_\_\_/

5.6 Si vous avez fait une biopsie/ cytoponction, quand vous avez reçu le résultat?

**\*Date la plus précise possible (Calendrier) :** \_\_\_\_\_(jj/mm/aaaa)

5.7 Estimation de la date : \_\_\_\_\_/

1=Date approximative      2=Date précise      3= Date vérifiée par \_\_\_\_\_/

5.8 Combien des investigations avez-vous fait avant d'avoir le diagnostic?

a) Mammographie \_\_\_\_\_/    b) Echographie \_\_\_\_\_/    c) Biopsie \_\_\_\_\_/    d) Cytoponction \_\_\_\_\_/    e) Chirurgie \_\_\_\_\_/

5.9 Le médecin a conseillé quel(s) type(s) de(s) traitement(s) ? \_\_\_\_\_/\_\_\_\_\_/\_\_\_\_\_/

1= La chirurgie    2= La chimiothérapie    3= La radiothérapie    4=Autres \_\_\_\_\_/

5.10 Juste après, quelle a été votre opinion sur le traitement ? \_\_\_\_\_/

1=Vous voulez le faire le plus vite possible      2=Vous avez hésité de le faire  
3=Vous ne voulez pas le faire      4=Autres \_\_\_\_\_/

5.11 Quelles difficultés avez-vous (eu) avant de commencer votre traitement? \_\_\_\_\_/\_\_\_\_\_/\_\_\_\_\_/

1= Pas de difficulté      2=Avoir un rendez-vous      3= Manques d'argent  
4= Manques des médicaments      5= Peur  
6=Autres \_\_\_\_\_/

5.12 Avez-vous déjà commencé votre traitement ? \_\_\_\_\_/

1=Oui    2= Non (continuer avec Module 7.)

**Module 6 : Le traitement**

6.1 Dans quelle structure sanitaire avez-vous commencé votre traitement ? \_\_\_\_\_ /  
 1=CS Ref      2= Hôpital      3=Clinique privé      4= Autre \_\_\_\_\_ /

6.2 Avec quelle type de traitement avez-vous commencé \_\_\_\_\_ /  
 1= La chirurgie    2= La chimiothérapie    3=Autre \_\_\_\_\_ /

6.3 Quand vous avez commencé/ fait le traitement ?

**\*Date la plus précise possible (Calendrier) :** \_\_\_\_\_(jj/mm/aaaa)

6.4 Estimation de la date : \_\_\_\_\_ /  
 1=Date approximative      2=Date précise      3= Date vérifiée par

6.5 Avez-vous déjà continué avec un deuxième traitement ? \_\_\_\_\_ /  
 1=Oui    2= Non (continuer avec Module 7)

6.6 Avec quelle type de traitement avez-vous continué \_\_\_\_\_ /  
 1= La chirurgie    2= La chimiothérapie    3=Autres \_\_\_\_\_ /

6.7 Dans quelle structure sanitaire avez-vous continué votre traitement ? \_\_\_\_\_ /  
 1=CS Ref      2= Hôpital      3=Clinique privé      4=Autres \_\_\_\_\_ /

6.8 Quand vous avez continué le traitement ?

**\*Date la plus précise possible (Calendrier) :** \_\_\_\_\_(jj/mm/aaaa)

6.9 Estimation du date : \_\_\_\_\_ /  
 1=Date approximative      2=Date précise      3= Date vérifiée par \_\_\_\_\_ /

**Module 7 : Suivie**

8.1. Date du dernier contact : \_\_\_\_\_(jj/mm/aaaa)

8.2. La patiente est décédée le : \_\_\_\_\_(jj/mm/aaaa)

**Merci pour votre support !**
